# Supplementary material
Source: Royal Society of Chemistry journal article supplement (doi:10.1039/d6gc01831a)
Supplement: d6gc01831a1.pdf [file d6gc01831a1.pdf]

## SUPPLEMENTAL INFORMATION

### Deep eutectic solvents regulates lignin: in situ synthesis of low curing temperature phenolic resin

Simiao Huang, and Corresponding Meiling Chen\*

The PDF file includes: Figure S1 to S12; Table S1 to S2.

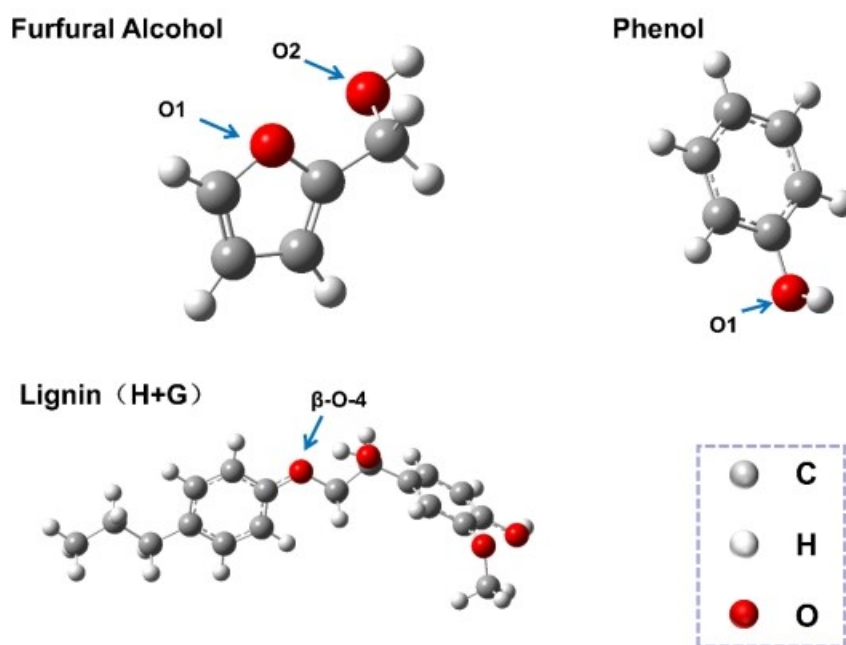

**Figure S1.** Optimized molecular structure and atomic positions of PFA-DES interacting with lignin models

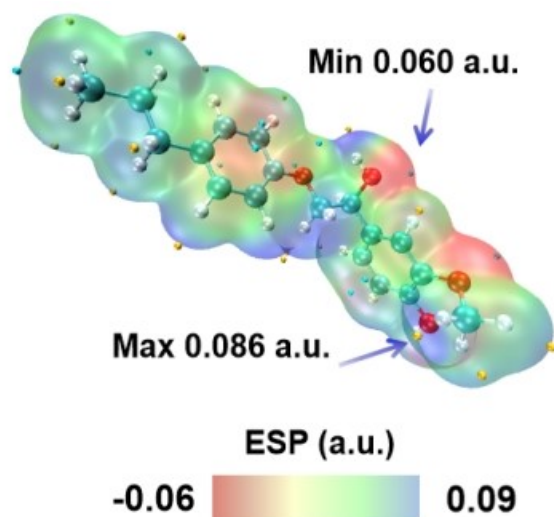

Figure S2. ESP image of lignin

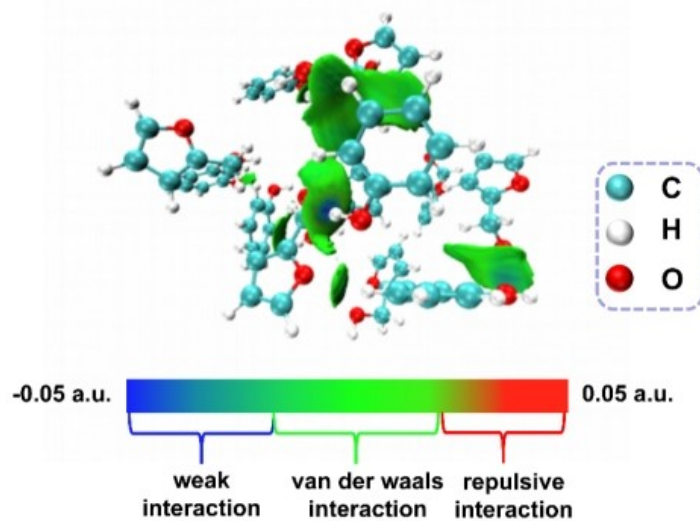

Figure S3. IGMH diagram

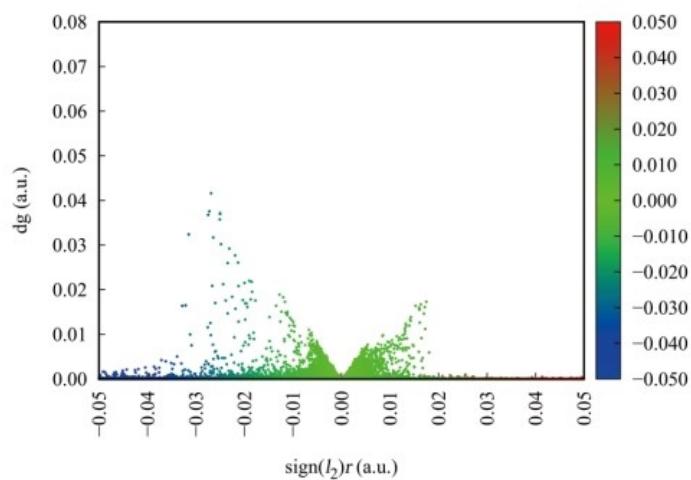

Figure S4. Scatter plot of IGMH data

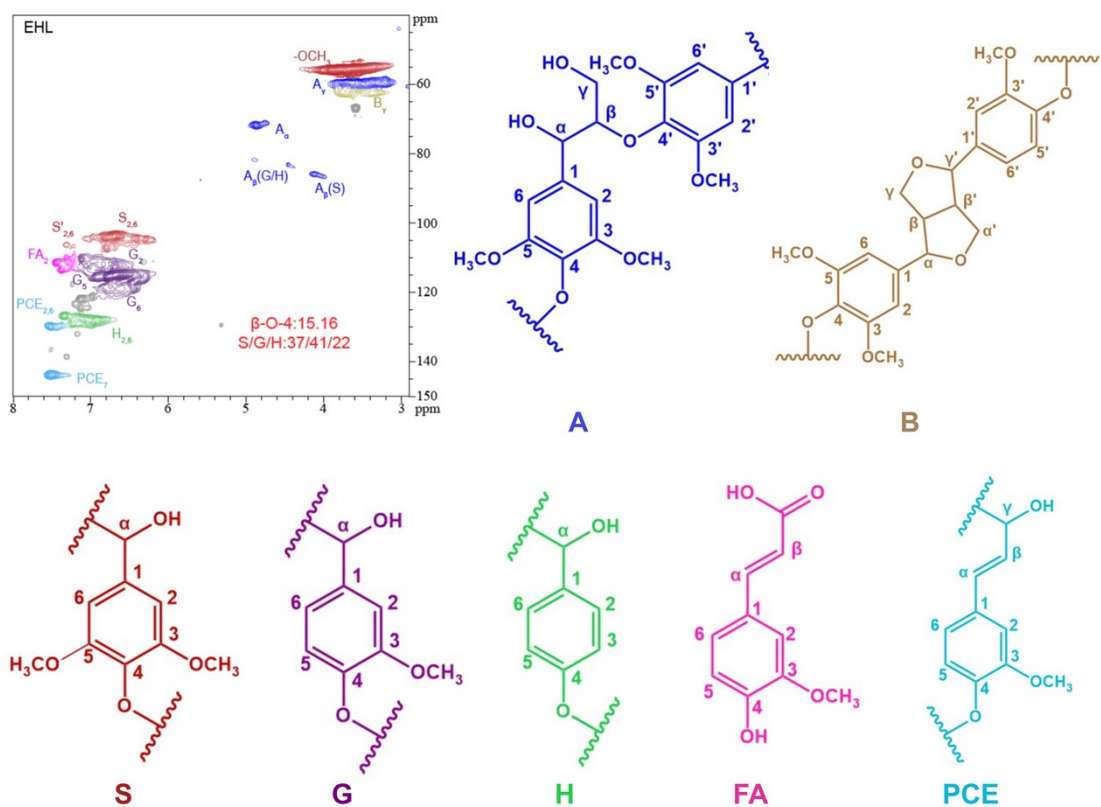

**Figure S5.** 2D-HSQC NMR spectra of lignins (aliphatic area and aromatic area) and main linkages and structural units: A ( $\beta-O-4$ ), B ( $\beta-\beta$ ), G (guaiacyl), S (eugenyl), H (p-hydroxyphenyl), FA (ferulic acid), and PCE (p-coumaric acid).

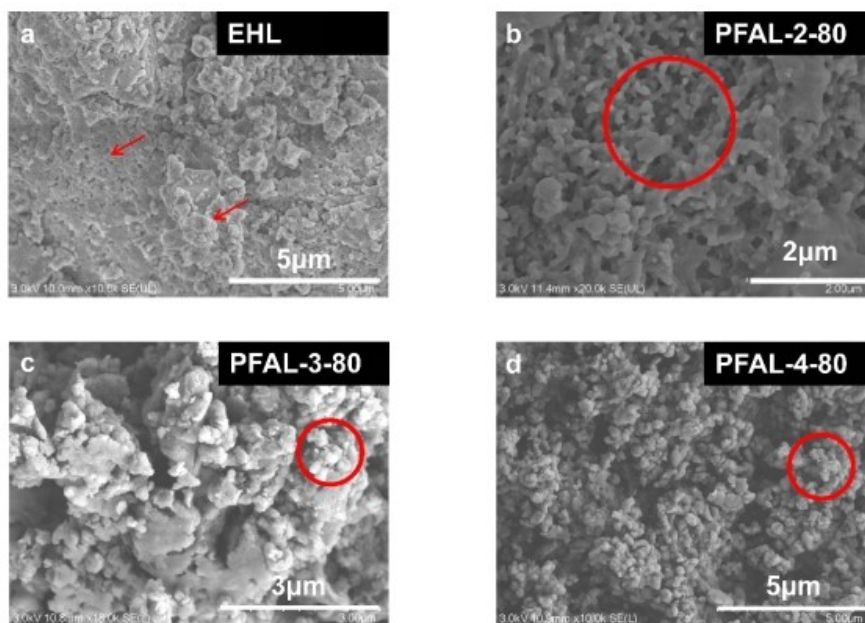

**Figure S6.** SEM spectra of EHL and modified lignin in 80 °C

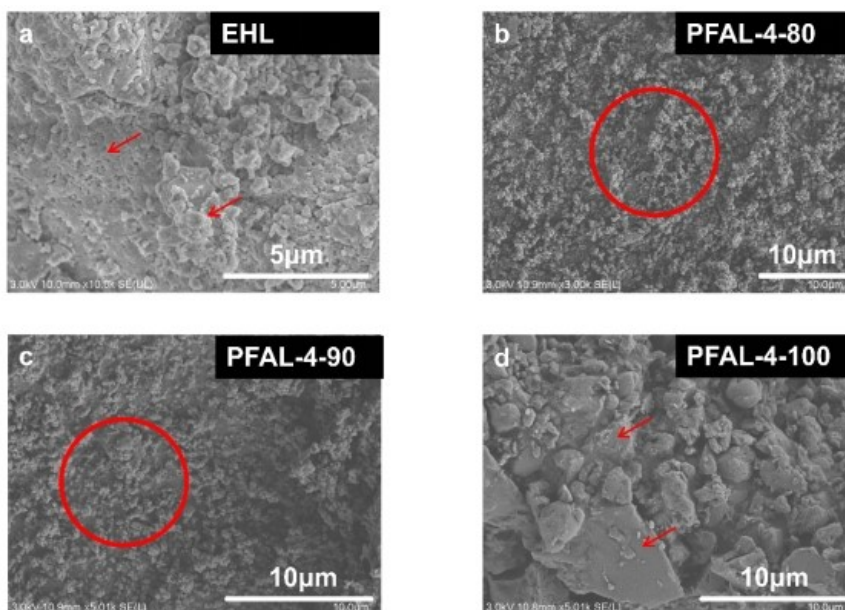

Figure S7. SEM spectra of EHL and modified lignin in 4h

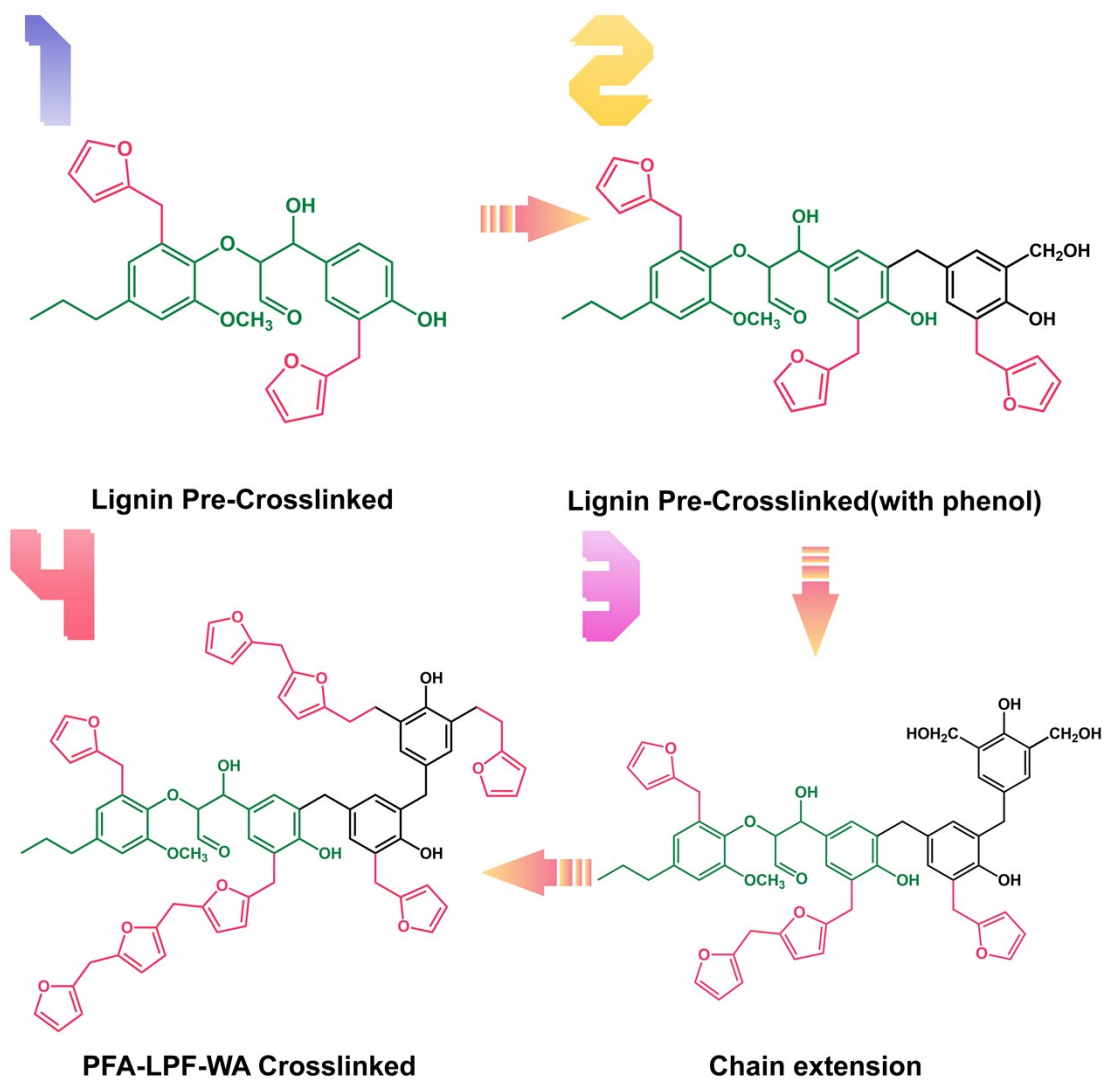

Figure S8. Schematic diagram of the synthesis of the PFA-LPF-WA main structure

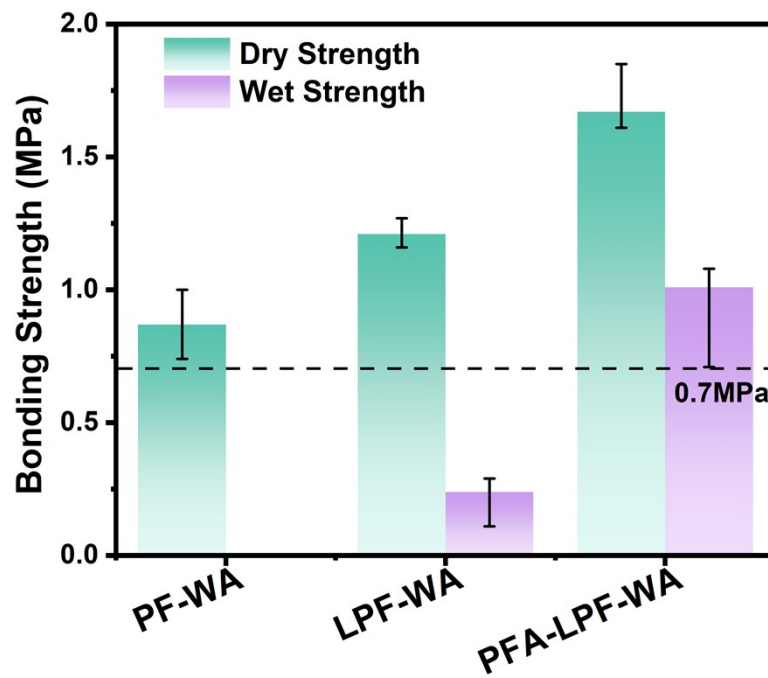

Figure S9. Bonding strength of adhesives with oxalic acid.

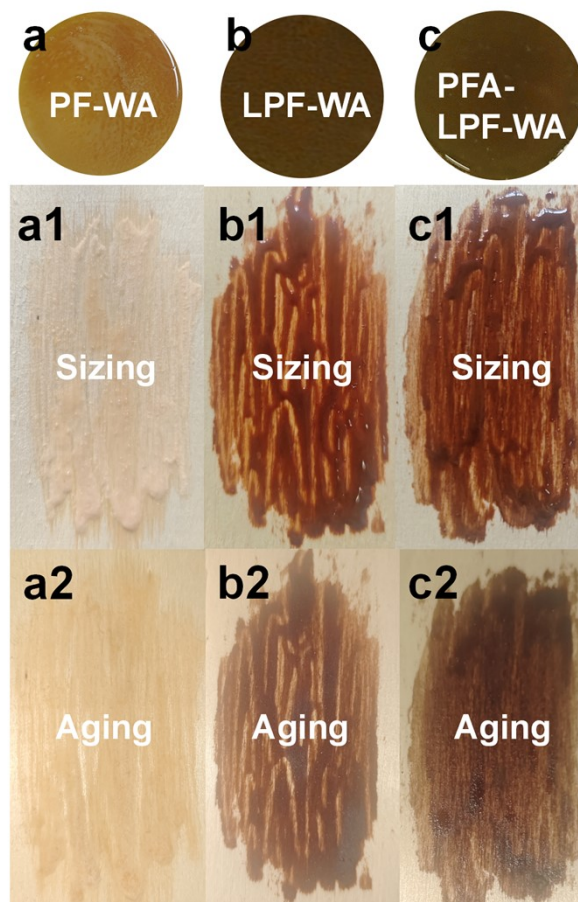

Figure S10. Appearance of oxalic-acid-containing adhesives (a-c), their spreading behavior on veneer (a1-c1), and their appearance after aging (a2-c2)..

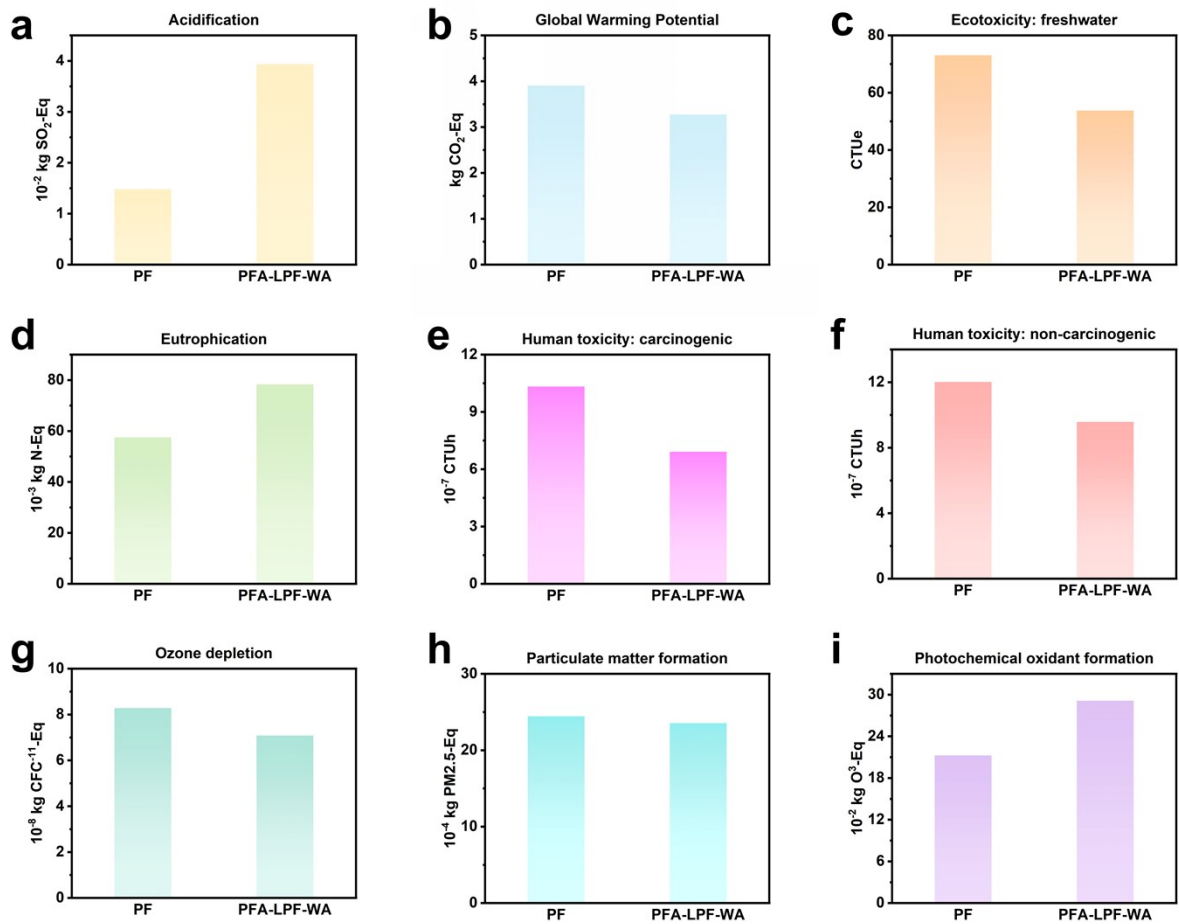

**Figure S11.** The specific values of the LCA for PF and PFA-LPF-WA.

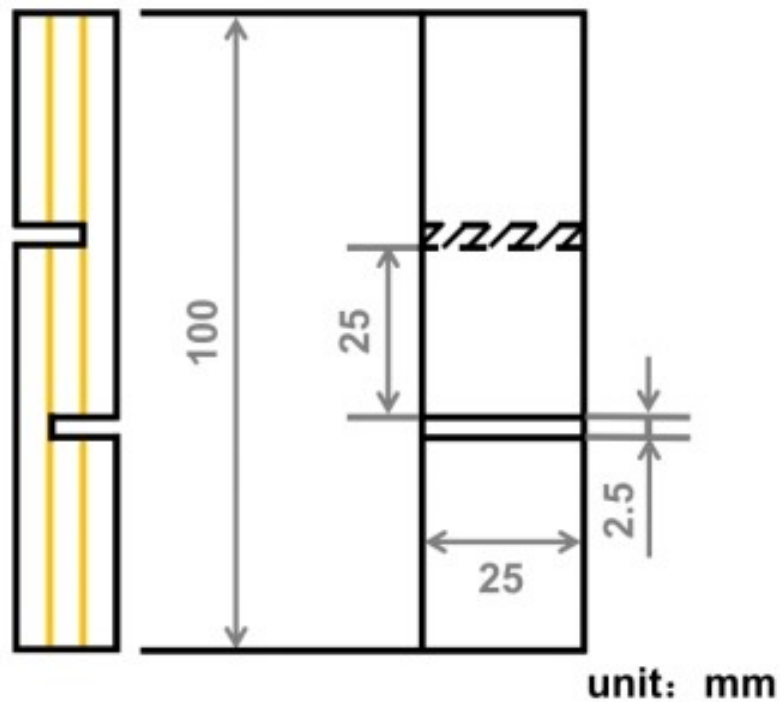

**Figure S12.** Schematic diagram of the cutting of bonded specimens

**Table S1.** Lignin phenol hydroxyl content and molecular weight

| Sample     | Phenolic hydroxyl (mmol/g) | $M_w$ | $M_n$ | PDI ( $M_w/M_n$ ) |
|------------|----------------------------|-------|-------|-------------------|
| EHL        | 3.95                       | 2608  | 1345  | 1.94              |
| PFAL-2-80  | 2.91                       | 3808  | 1636  | 2.33              |
| PFAL-3-80  | 1.98                       | 5736  | 2090  | 2.75              |
| PFAL-4-80  | 0.81                       | -     | -     | -                 |
| PFAL-2-90  | 1.79                       | 3814  | 1304  | 2.92              |
| PFAL-3-90  | 1.03                       | 4125  | 1417  | 2.91              |
| PFAL-4-90  | 1.28                       | 5176  | 1633  | 3.17              |
| PFAL-2-100 | 1.88                       | 5964  | 1873  | 3.18              |
| PFAL-3-100 | 0.40                       | 5288  | 1976  | 2.68              |
| PFAL-4-100 | 0.72                       | 9840  | 2755  | 3.57              |

**Table S2.** Cost of PFA-LPF-WA per Tonne

| Components/Energy              | Consumption (t or kW·h) | Prices (¥/ t or kW·h) | Cost (¥)  |
|--------------------------------|-------------------------|-----------------------|-----------|
| Water                          | 0.379                   | 3 ~ 5                 | 1~2       |
| Electricity                    | 15.4                    | 0.3 ~ 0.5             | 5~6       |
| EHL                            | 0.05                    | 800 ~ 1000            | 40~50     |
| Furfuryl alcohol               | 0.32                    | 8000~9500             | 2560~3040 |
| formaldehyde solution (37 wt%) | 0.334                   | 1000 ~ 1100           | 334~368   |
| Oxalic acid                    | 0.08                    | 2000 ~ 2500           | 160~200   |
| Phenol                         | 0.2                     | 6000~6300             | 1200~1260 |
| Total                          |                         | 4300~4926             |           |
